# Supplementary material for: Precision modeling of mitochondrial diseases in zebrafish via DdCBE-mediated mtDNA base editing
Source: PubMed Central journal article supplement (PMC8417030; doi:10.1038/s41421-021-00307-9), 2021-09-03
Supplement: 41421_2021_307_MOESM1_ESM.pdf [file 41421_2021_307_MOESM1_ESM.pdf]

## Supplementary information

### **Precision modeling of mitochondrial diseases in zebrafish via DdCBE-mediated mtDNA base editing**

#### **Contents**

#### **Materials and Methods**

**Figure S1.** Architecture of RVD library and DdCBE backbone.

**Figure S2.** Activity of one-step assembled DdCBE pair in HEK293FT cells.

**Figure S3.** Conservation analysis of targeting sites between human and zebrafish.

**Figure S4.** DdCBE-mediated mtDNA mutations in zebrafish.

**Figure S5.** DdCBE-mediated editing in tissues from founders.

**Figure S6.** Germline transmission of mtDNA base editing.

**Figure S7.** Morphology feature and behavior analysis of mtDNA edited fish.

**Figure S8.** Off-target analysis by whole mtDNA sequencing.

**Figure S9.** Off-target analysis in founders.

**Table S1.** Toxicity of DdCBE in zebrafish embryogenesis.

**Table S2.** Summary of mtDNA base editing efficiency of founders.

**Table S3.** Summary of germline transmission in offspring.

**Table S4.** Primer information.

#### **Supplementary sequence**

## **Materials and Methods**

### *Construction of RVD library*

We designed 10 staggered positions for Dimer RVD modules (Position 1-10), 4 staggered positions for monomer RVD modules (Position 7-10) and half modules (Position 8-11), respectively. Each module flanked with two Bsa I sites was amplified from the reported library <sup>1</sup> and cloned to the vector containing tetracycline resistance gene <sup>2</sup>, creating a set of 192 module plasmids. Backbone plasmids MTS-DdCBE and NLS-DdCBE, with localization signal, N terminus of TALE, cccb, C terminus of TALE and split DddA, were synthesized according to the previous reports <sup>1, 3</sup>. The complete set of plasmids for assembling DdCBE has been deposited to Addgene (Shen Lab DdCBE kit).

### *Assembly of DdCBE*

To construct DdCBE expression plasmids, 50 ng of each module and 100 ng of backbone plasmid were subjected to digestion and ligation in a single 10  $\mu$ L reaction containing 0.5  $\mu$ L Bsa I-HFv2 (#R3733L, NEB) and 0.5  $\mu$ L T4 DNA Ligase (#M0202M, NEB) in T4 DNA ligase buffer. The reaction was incubated in a thermocycler for 10 cycles of 10 min at 37°C and 10 min at 16°C, then heated to 50°C for 5 min and then 80°C for 5 min. 2  $\mu$ L of ligation mixture was used to transform *Escherichia coli* competent cells. The assembled plasmids were identified using PCR and further confirmed by Sanger sequencing. PCR primers and sequencing primers are listed in Table S4. Sequences of DdCBE plasmids constructed in this study are list in Supplementary sequence.

### *Cell culture and nucleofection*

HEK293FT cells (Thermofisher, R70007) were cultured in DMEM supplemented with 10% FBS at 37°C with 5% CO<sub>2</sub>, and detected without mycoplasma contamination by PCR test. Cells were co-transfected with 50 ng pEGFP-N1 containing the target fragment, 300 ng left-DdCBE and 300 ng right-DdCBE using Lonza 4D-Nucleofector by SF Cell Line 4D-Nucleofector X Kit. Cells were supplemented with 2 µg/mL puromycin 24 hrs post nucleofection, and collected at day 3 and day 6 for DNA extraction.

#### *In vitro transcription of DdCBE mRNA*

The mRNA of DdCBE pair was transcribed with mMESSAGE mMACHINE T7 Ultra Kit (Life, AM1345) according to the manufacturer's protocol. In brief, equal molar of left-MTS-DdCBE and right-MTS-DdCBE containing T7 promoter were mixed and linearized with Pme I (NEB). Then the linearized DNA was purified with DNA Clean & Concentrator™-5 (Zymo Research). 500 ng of purified DNA was used for transcription. The transcribed mRNA was recovered by the RNA Clean & Concentrator™-5 (Zymo Research) and stored at -80°C until use.

#### *Zebrafish husbandry*

All animal experimentations were carried out in accordance with approved guidelines of the Institutional Animal Care and Use Committee of the Nanjing University. All zebrafish lines were kept on AB background. Adult zebrafish were maintained with automatic fish housing system at 28°C under a 14/10 hrs light-dark cycle. Zebrafish embryos were maintained at 28°C in 10% Hank's solution and staged with standard techniques.

#### *Micro-injection of one-cell stage zebrafish embryos*

Transcribed mRNA and phenol red were co-injected into one-cell stage fertilized zebrafish eggs as previously described<sup>4</sup>. Each embryo was injected with 1 nL of solution then incubated at 28°C for the following experiments.

#### *Zebrafish swimming assay*

A swim-tracking test was performed as previously described<sup>5</sup>. Zebrafish were placed in an opaque acrylic tank (length: 11.5 cm; width: 9 cm) containing aquarium water (depth: 6 cm) and acclimatized for 2 min. Zebrafish swimming was recorded for 5 or 10 min with Ethovision XT software (Noldus, Wageningen, Netherlands). At least eight zebrafish for each group were analyzed for this assay. Uninjured and sham-injured zebrafish were used as controls.

#### *Transmission electron microscopy*

Zebrafish muscle tissues were dissected and fixed with 2.5% (v/v) glutaraldehyde in 0.2 M cacodylate buffer (50 mM cacodylate, 50 mM KCl, and 2.5 mM MgCl<sub>2</sub>, pH 7.2) overnight. After washing with cacodylate buffer, the tissues were cut into approximately 1-2 mm<sup>3</sup> pieces and immersed in 1% OsO<sub>4</sub> in 0.2 M cacodylate buffer for 2 hrs at 4°C. Then the samples were washed and submerged in 0.5% uranyl acetate overnight, dehydrated through a graded series of ethanol, and embedded in resin (Low Viscosity Embedding Media Spurr's Kit, EMS, 14300). Ultrathin sections were cut on an ultramicrotome and mounted on copper grids. The sections were stained with uranyl acetate and lead citrate and observed using a JEM-1400 transmission electron microscope (JEOL).

#### *DNA extraction and genotyping*

Genomic DNA of HEK293FT cells were extracted with QuickExtract™ DNA Extraction Solution (Lucigen). Live zebrafish embryo genotyping was performed as previous described<sup>6</sup>. Briefly, at day 3 post-fertilization, single fish embryo was put into one well of 96-well plate filled with DNA collection buffer (with proteinase K 15 µg/mL) and shaken for 30 min at 37°C, then 5 µL solution containing skin cell was used as PCR template. Genomic DNAs of zebrafish embryo, juvenile zebrafish and adult zebrafish fish organs were prepared using DNA collection buffer with proteinase K (15 µg/mL) in 0.3M Tris-HCl pH8.0 buffer. The fragments spanning the editing sites were amplified with specific primers for Sanger sequencing. Primers are listed in the Table S4.

#### *Western blot for DdCBE expression*

Injected embryos were collected at 12 hpf, 24 hpf and 48 hpf, and homogenized by lysis buffer (50 mM Tris-Cl pH7.4, 150 mM NaCl, 1% Triton X-100, 0.1% SDS and protease inhibitors cocktail). 50 µg protein of each sample was loaded onto 10% gels for electrophoresis, and then transferred to a PVDF membrane (Millipore). Membranes were incubated with primary antibody overnight at 4°C using anti-GAPDH (Santa Cruz, sc-32233) and Anti-DDDDK-tag pAb (MBL, PM020), followed by wash with TBST and incubation with second antibodies (peroxidase Goat anti-Rabbit or Goat anti-mouse IgG) for 1 h at room temperature. Signal was detected with enhanced chemiluminescence detection reagent (Vazyme) and imaged by Tannon4500 SF.

#### *Immunofluorescent staining*

HEK293FT cells were nucleofected with DdCBE pair, and labelled with 100 nM Mito-Tracker (Beyotime, C1035) for 30 min at 37°C with 5% CO<sub>2</sub> 48 hrs post-transfection. Then

cells were fixed with 4% PFA and penetrated with 0.05% Triton X-100. After blocking with 5% BSA for 2 hrs at room temperature, the cells were incubated with anti-DDDDK-tag and Alexa Flour-conjugated anti-rabbit IgG sequentially. Images were captured using Laser scanning confocal microscope (ZEISS LSM800).

### *Deep sequencing*

Genomic regions of interest were firstly amplified with barcoded primers (first round PCR, PCR1) using Phanta Max Super-Fidelity DNA Polymerase (Vazyme). The PCR1 products were pooled with equal moles and purified for the second round PCR (PCR2). PCR2 was performed using index primers (Vazyme) and purified by DNA Clean Beads for sequencing using Illumina NovaSeq platform. Barcoded primers used for PCR1 are listed in Table S4.

### *Whole mtDNA sequencing*

Whole mtDNA sequencing was performed as previously reported <sup>3</sup>. In brief, two overlapping fragments around 8 kb each were amplified and purified using gel extraction. The two fragments were pooled with equal moles and subjected to library preparation using TruePrep™ DNA Library Prep Kit V2 for Illumina (Vazyme). The libraries were purified using DNA Clean Beads by 0.5×/0.35× double size selection. Libraries were pooled and sequenced by Illumina NovaSeq platform. Primers for amplification of long-range PCR are listed in Table S4.

To detect SNPs in signal embryos of our wild-type strain, we used ATAC-seq to perform whole mitochondrial genome sequencing as previously described <sup>3</sup>. In brief, single

zebrafish embryos were tagmented with 0.5  $\mu$ L Tn5 transposase (Vazyme) in a total volume of 10  $\mu$ L lysis buffer containing 1 $\times$ TD buffer, 0.2% NP-40 and 0.3 $\times$ PBS. Reactions were incubated at 37°C for 30 min on a thermomixer and stored at -80°C until use. Libraries were prepared using TruePrep<sup>TM</sup> DNA Library Prep Kit V2 for Illumina (Vazyme). 200-1000 bp were selected using Fast Pure Gel DNA Extraction Mini Kit (Vazyme). Libraries were pooled and sequenced by Illumina NovaSeq platform.

#### *Deep sequencing data analysis*

The *Danio rerio* (zebrafish) mitochondrial genome reference sequence (NC\_002333) was downloaded from NCBI database. Bowtie2 was used to build the alignment index using default parameters. Paired end reads with overlap were merged into a single read, and bowtie2 was used for alignment in single end mode. Otherwise, reads were mapped in paired end mode by using bowtie2 with default parameters. Alignment results were converted to bam format using samtools and visualized in Integrative Genomics Viewer (IGV). Bases with depth over 2 million were truncated to 2 million, and only C-to-T or G-to-A conversion was calculated for DdCBE-mediated editing.

#### *Whole mtDNA sequencing data analysis*

For sequencing data, quality control by fastqc and trim\_galore in paired end mode was performed. The Illumina adapter sequence or Ns in either side of the read was trimmed, and only reads with quality over 20 were kept for further analysis. QC-passed reads were mapped to NC\_002333 by using bowtie2 with default parameters of paired end. The DdCBE editing efficiency was calculated as mentioned above.

### *Off-target analysis*

SNP sites of zebrafish were obtained from Variation VCF in Ensembl database, which includes 64 annotated C/G to T/A variation, and from SNPfisher database<sup>7</sup>, which includes 66 annotated C/G to T/A variation. The combined SNP dataset was used for further analysis. For the off-target analysis, the following sites were excluded before analysis and visualization: (1) the above obtained SNP sites; (2) the sites of which C/G to T/A variation over 1% in any control sample; (3) the evident SNP sites of which C/G to T/A variation over 90% in any sample; (4) sites within the DdCBE spacing region. The average off-target editing frequency was calculated as described before<sup>3</sup>. Briefly, the sites with C/G to T/A conversion were used for calculating average off-target editing frequency independently for each biological replicate as: the sum events of C/G to T/A conversion were divided by the total coverage of these sites.

### **Reference**

- 1 Huang, P. *et al.* Heritable gene targeting in zebrafish using customized TALENs. *Nat Biotechnol* **29**, 699-700 (2011).
- 2 Cermak, T. *et al.* Efficient design and assembly of custom TALEN and other TAL effector-based constructs for DNA targeting. *Nucleic Acids Res* **39**, e82 (2011).
- 3 Mok, B. Y. *et al.* A bacterial cytidine deaminase toxin enables CRISPR-free mitochondrial base editing. *Nature* **583**, 631-637 (2020).
- 4 Suster, M. L., Kikuta, H., Urasaki, A., Asakawa, K. & Kawakami, K. Transgenesis in zebrafish with the tol2 transposon system. *Methods Mol Biol* **561**, 41-63 (2009).
- 5 Fang, P. *et al.* HMGB1 contributes to regeneration after spinal cord injury in adult zebrafish. *Mol Neurobiol* **49**, 472-483 (2014).
- 6 Zhang, X., Zhang, Z., Zhao, Q. & Lou, X. Rapid and Efficient Live Zebrafish Embryo Genotyping. *Zebrafish* **17**, 56-58 (2020).
- 7 Butler, M. G. *et al.* SNPfisher: tools for probing genetic variation in laboratory-reared zebrafish. *Development* **142**, 1542-1552 (2015).



**Figure S1**

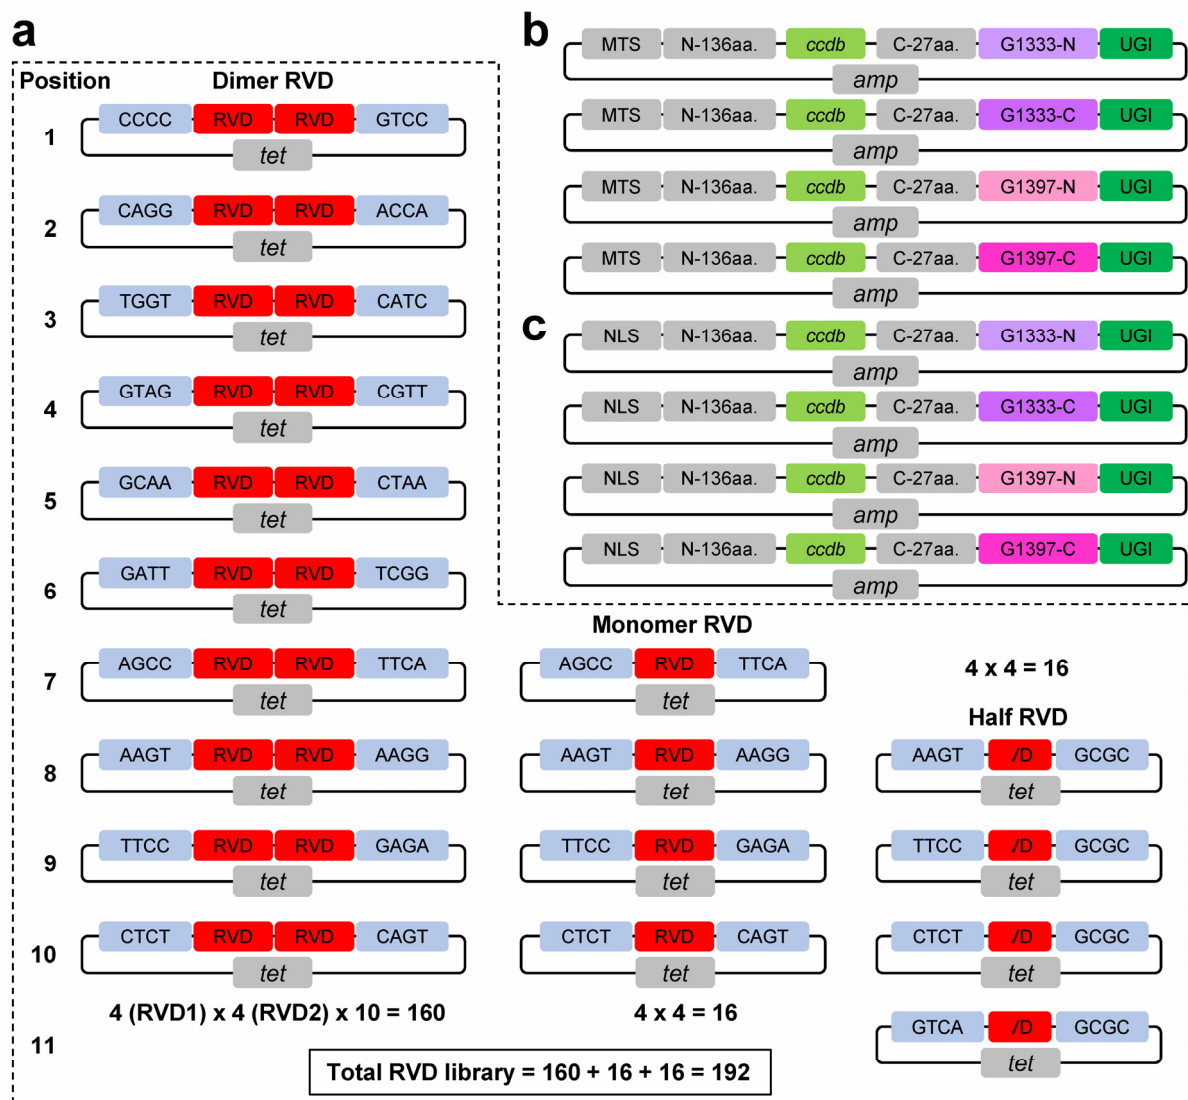

**Figure S1. Architecture of RVD library and half DdcBE backbones.**

(a) Scheme of RVD plasmid library. A total of 192 RVD plasmids were constructed including 160 dimer RVD modules, 16 monomer RVD modules and 16 half RVD modules.

(b, c) Scheme of DdcBE backbones with half DddA<sub>tox</sub> and mitochondrial localization signal (b) or nuclear localization signal (c).

**Figure S2**

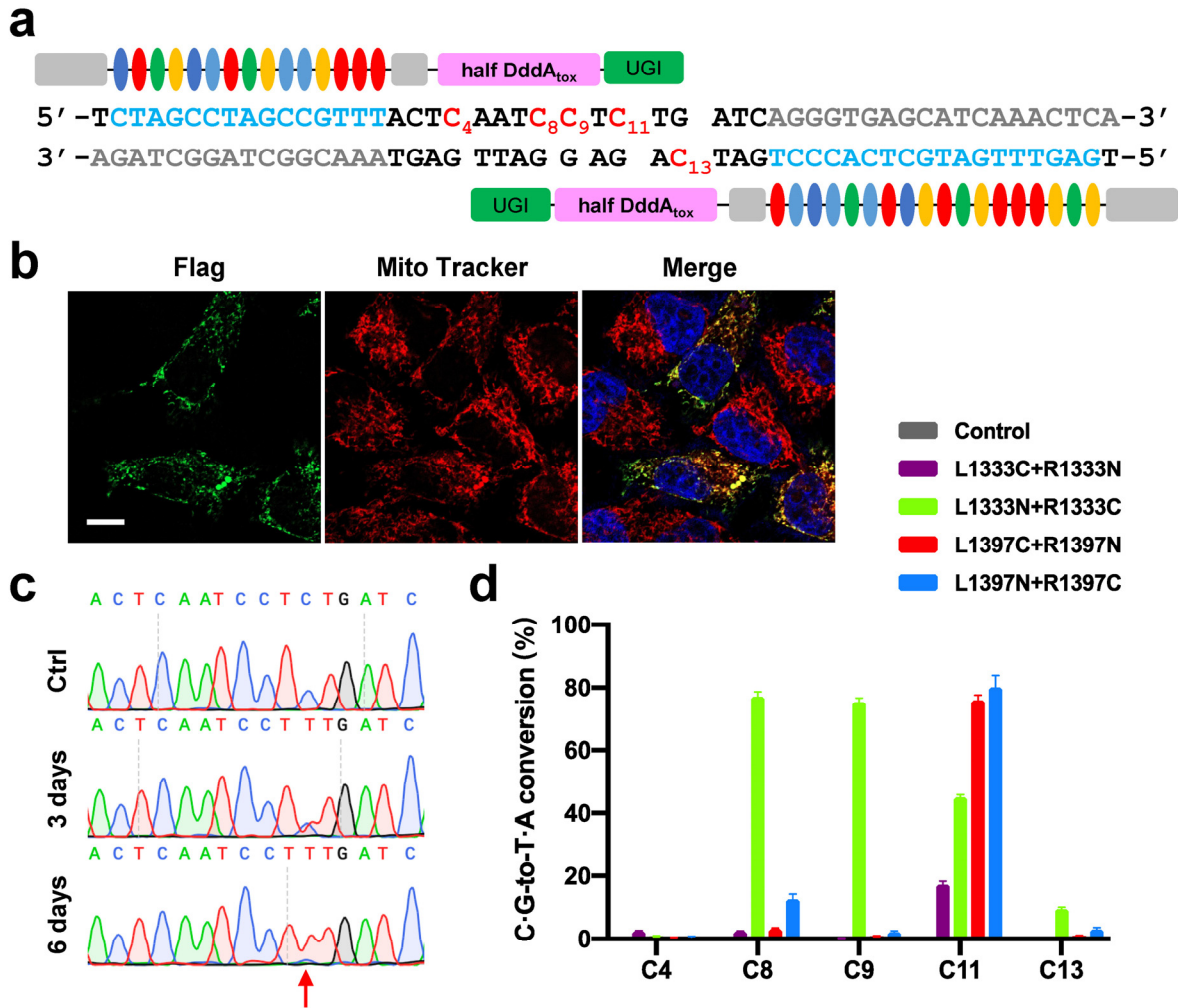

**Figure S2. Activity of one-step assembled DdCBE pair in HEK293FT cells.**

(a) The assembled DdCBE pairs enable targeting *MT-ND1*. Cytosine in spacing region are numbered and shown in red. RVDs recognition sequences are in blue.

(b) Fluorescence imaging of flag-tagged DdCBE in HEK293FT cells. Mitochondria were labeled with Mito Tracker. Scale bar, 25  $\mu$ m.

(c) Confirmation of editing in the spacing region by Sanger sequencing at day 3 and 6 post transfection. The untreated cells were used as control. The targeted site is indicated by the red arrow.

(d) Editing efficiencies of DdCBE pairs determined by deep sequencing. The data are presented as Means  $\pm$  SEM (n = 3).

**Figure S3**

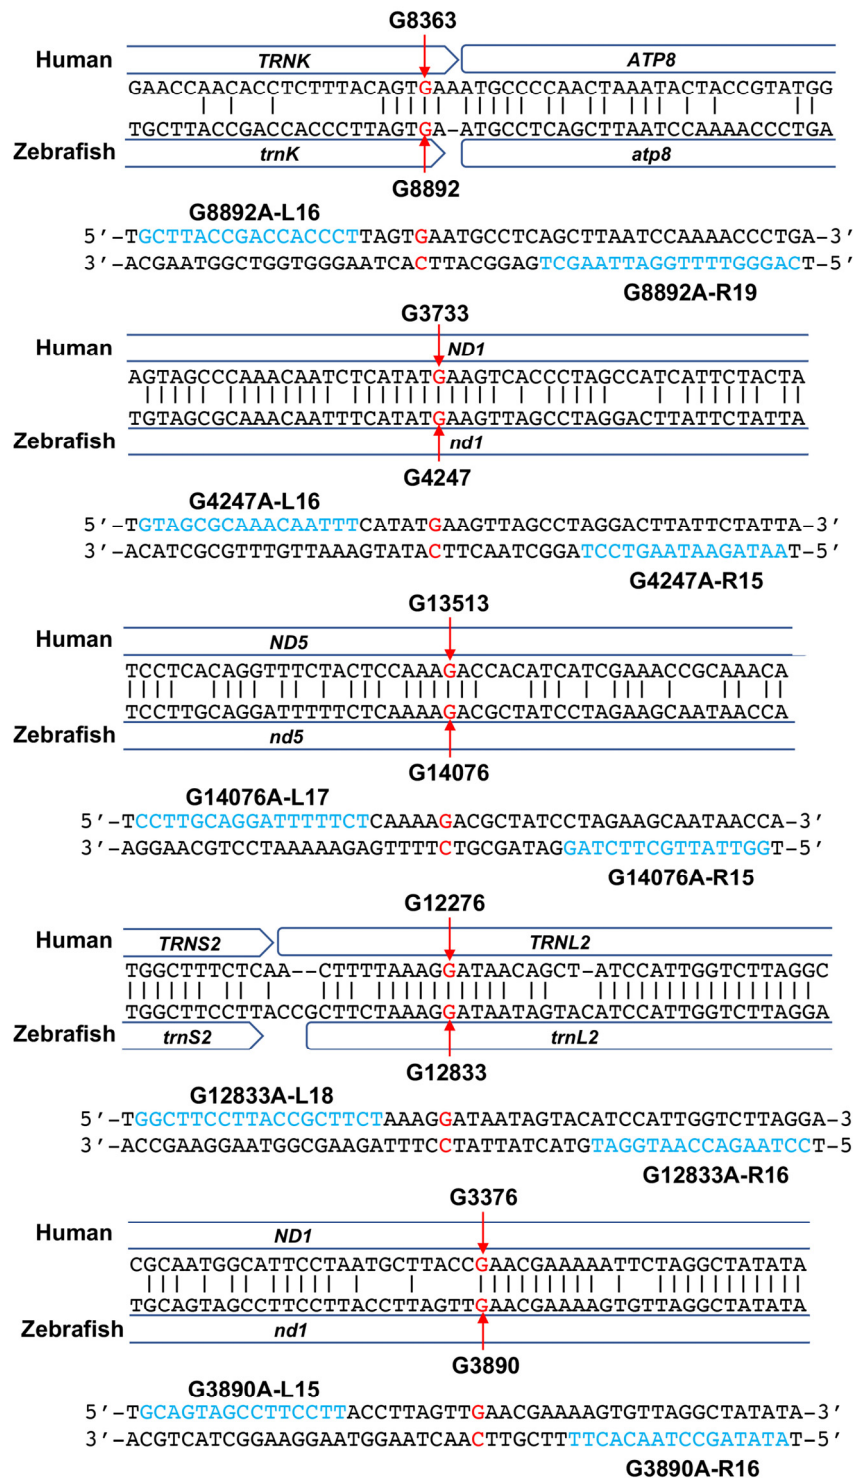

**Figure S3. Conservation analysis of targeting sites between human and zebrafish.**  
 The target base is shown in red and indicated by arrow. RVDs recognition sequences are in blue.

**Figure S4**

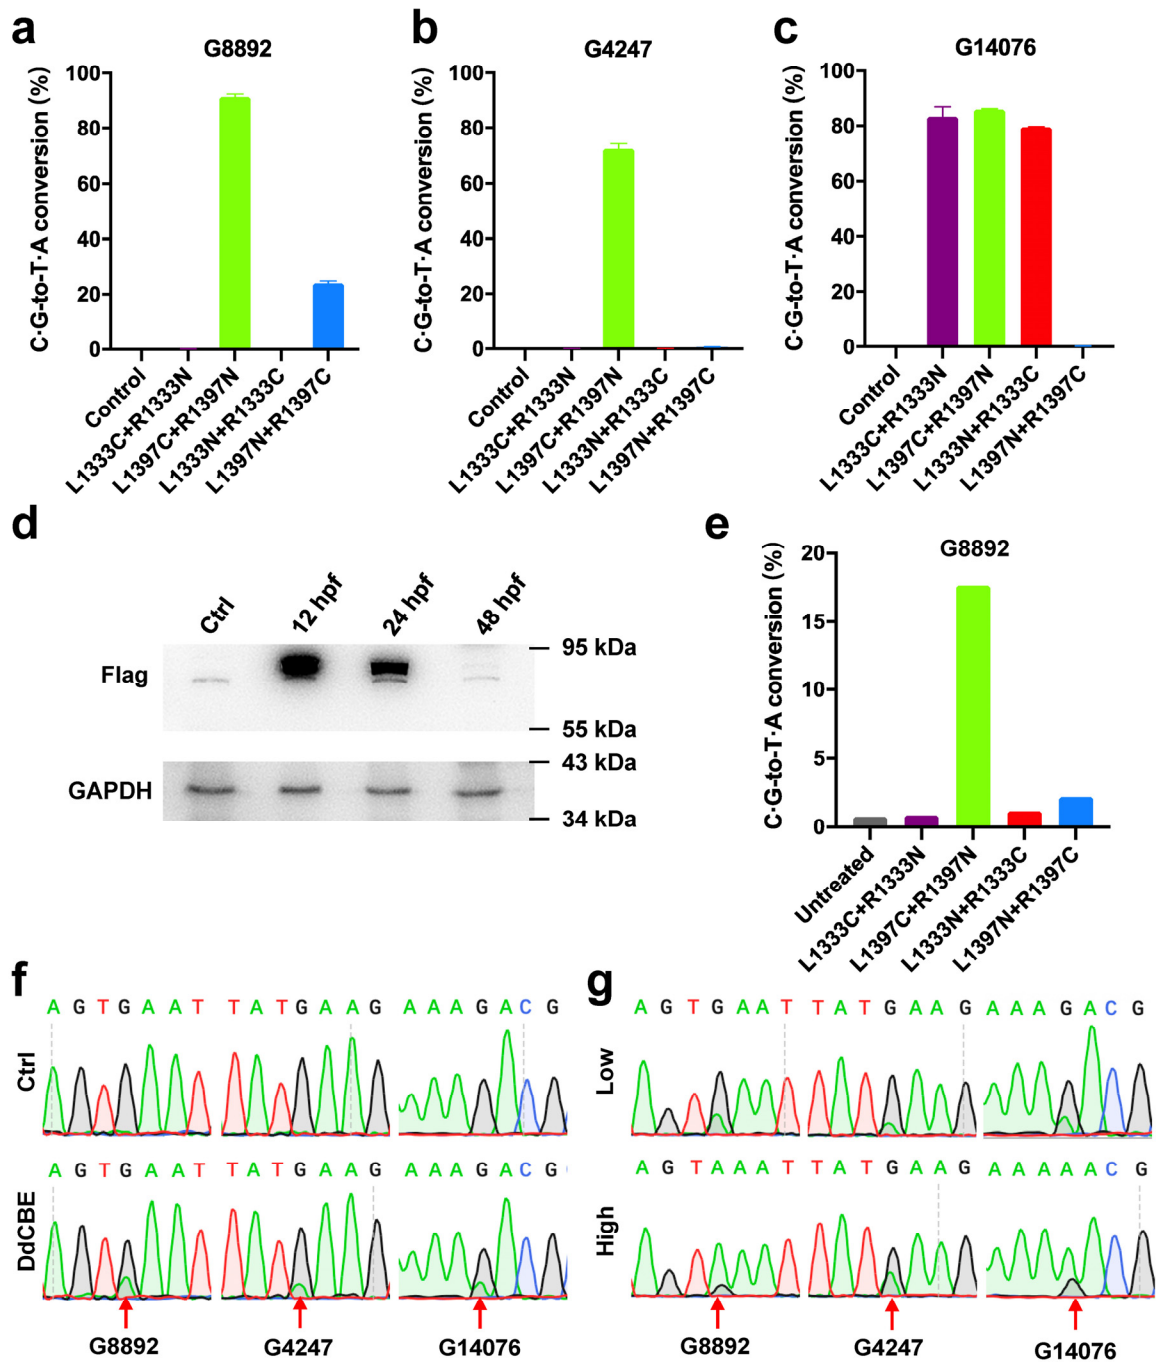

**Figure S4. DdCBE-mediated mtDNA mutations in zebrafish.**

(a-c) The editing efficiencies of NLS-DdCBE pairs targeting G8892 (a), G4247 (b) and G14076 (c) in HEK293FT cells.

(d) Expression of MTS-DdCBE pair (L1397C + R1397N) in zebrafish embryos injected with

DdCBE mRNA at 12, 24 and 48 hpf. Untreated zebrafish embryos were used as control.

(e) The activity of MTS-DdCBE pairs targeting G8892 in pooled embryos.

(f) Confirmation of mtDNA editing by Sanger sequencing in pooled embryos treated with DdCBE pair's mRNA for G8892, G4247 and G14076.

(g) Representative sequence chromatograms of G8892, G4247, and G14076 founders with low and high editing efficiency. The target sites are indicated by the red arrow.

Figure S5

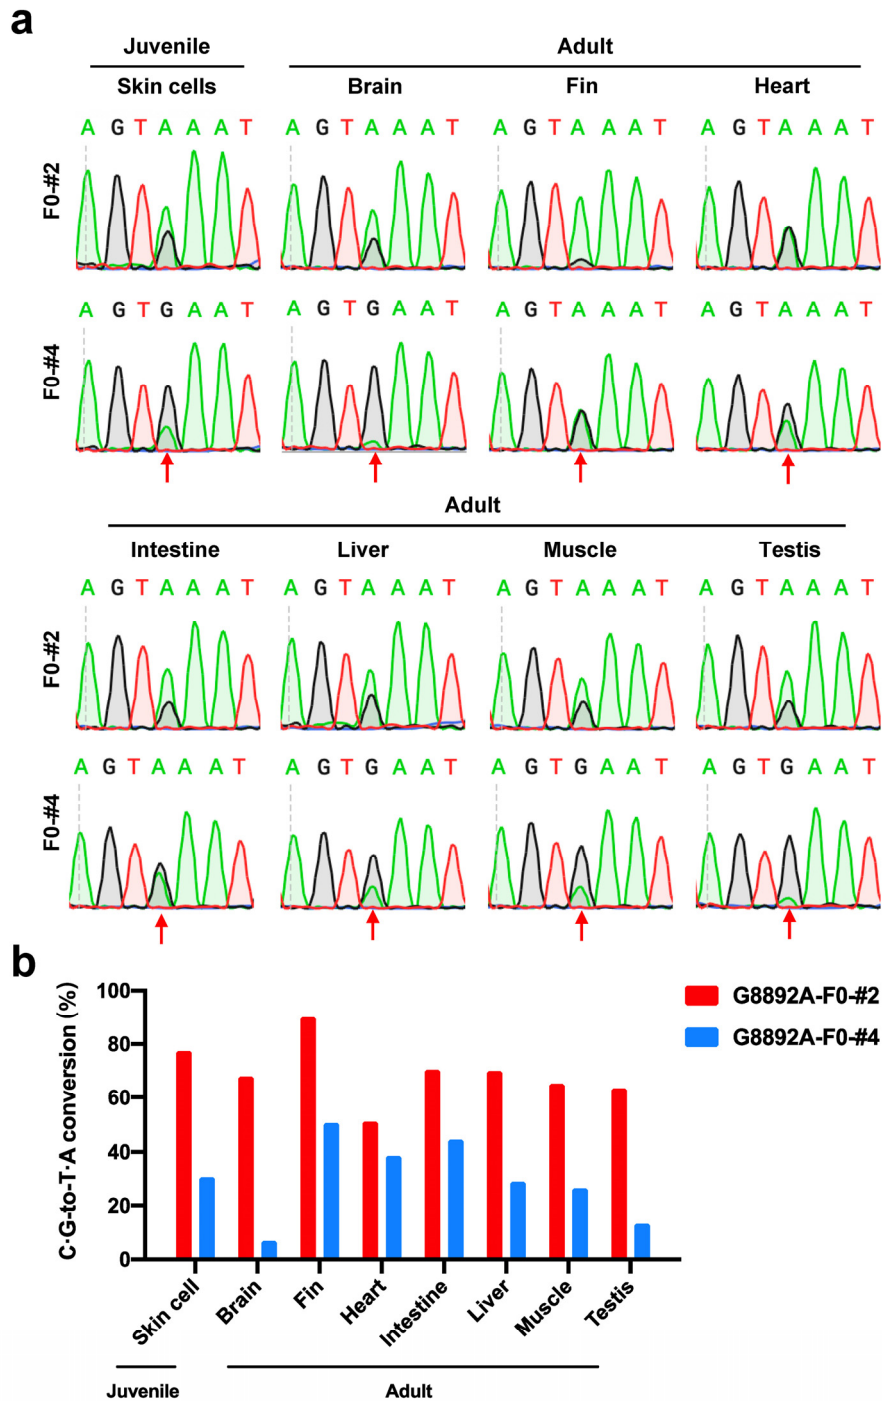

**Figure S5. DdCBE-mediated editing in tissues from founders.**

(a) Sequence chromatograms of tissues in G8892 #2 and #4 founders. The edited site are indicated by arrows.

(b) Deep sequencing analysis of C-G-to-T-A conversions in G8892 #2 and #4 founders.

**Figure S6**

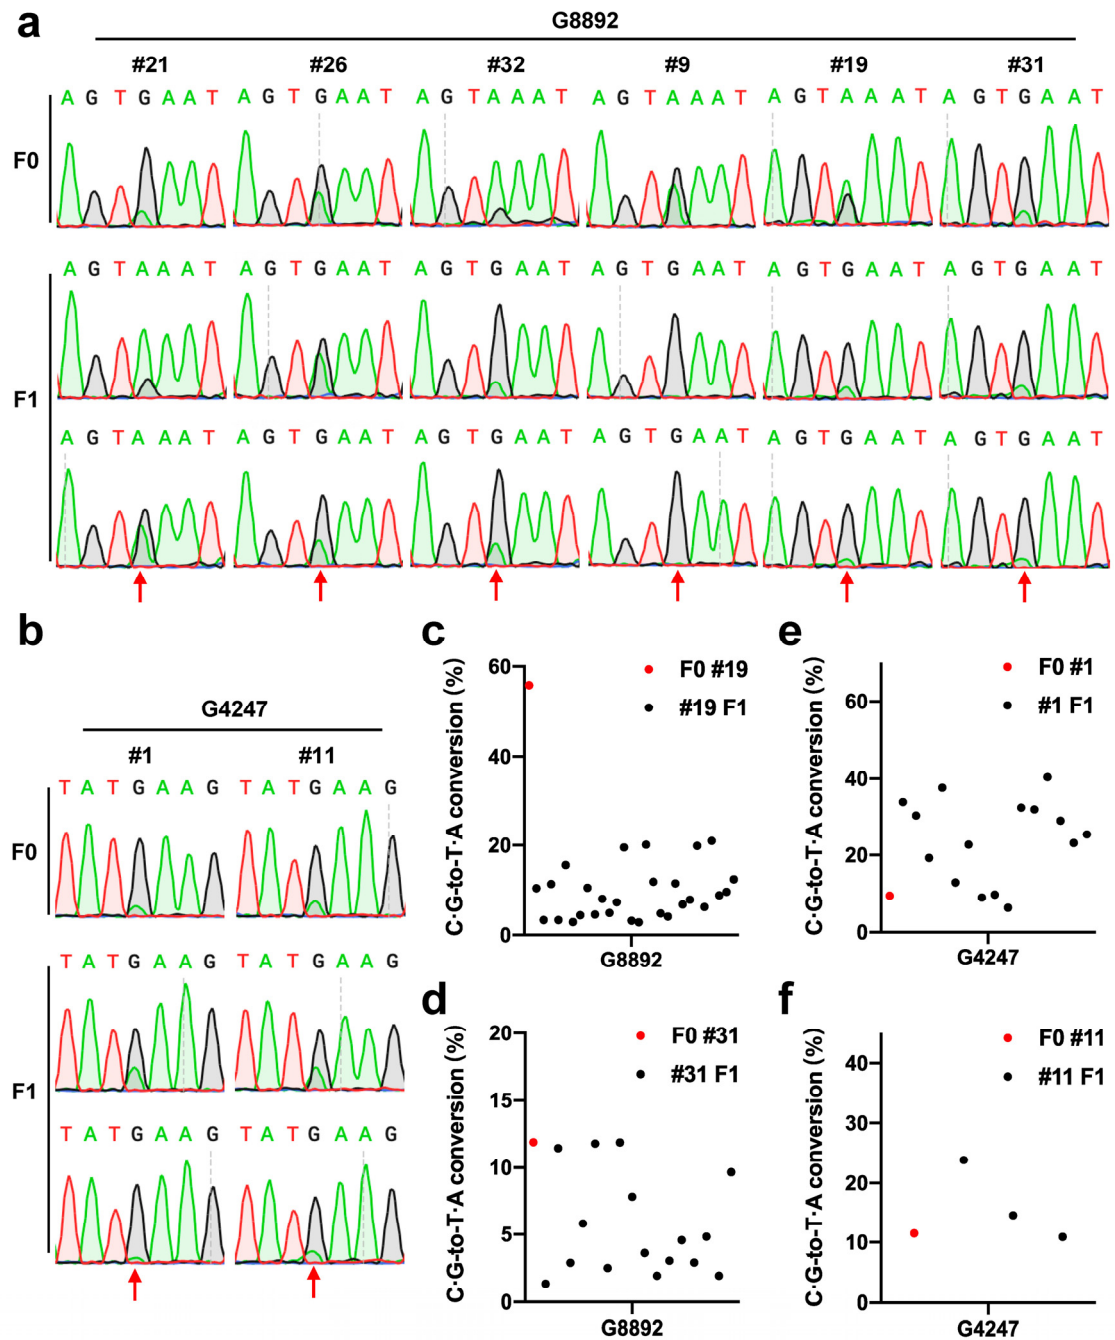

**Figure S6. Germline transmission of mtDNA base editing.**

(a, b) Representative sequence chromatograms of mtDNA editing in G8892 F0 (a), G4247 F0 (b) and their corresponding F1.

(c-f) Deep sequencing analysis of transmission of mtDNA mutation in founders and their corresponding offspring. Red and black dots indicate F0 and F1, respectively.

**Figure S7**

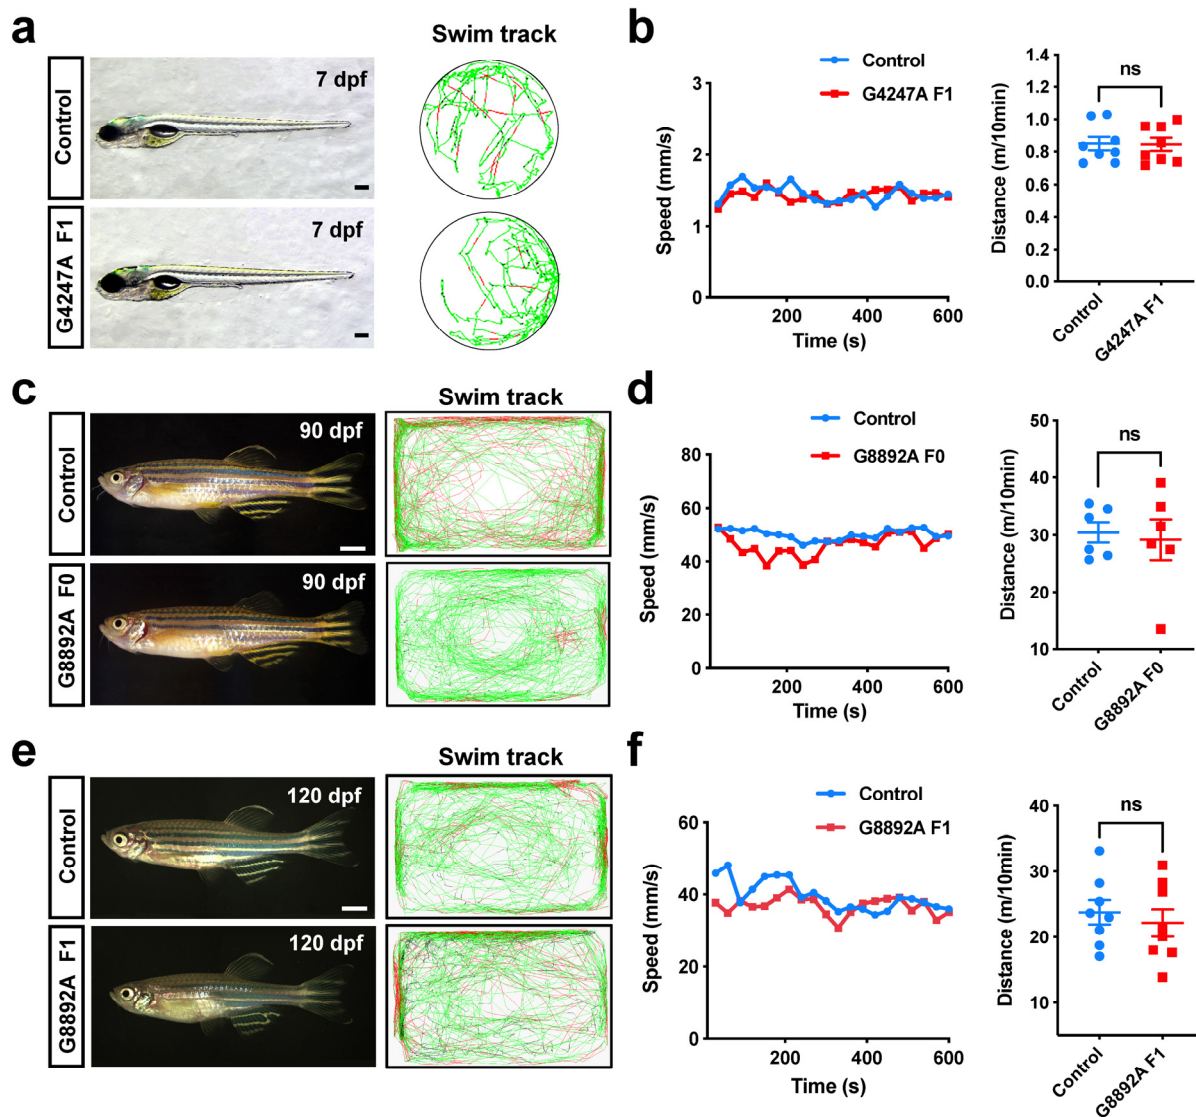

**Figure S7. Morphology feature and behavior analysis of mtDNA edited fish.**

(a) Left panels, live images of control and G4247A F1 zebrafish larvae at 7 days post-fertilization. Lateral view, anterior to the left. Scale bar, 20  $\mu$ m. Right panels, representative swim tracking of individual animals. Colour coding represents movement speed: red, faster than 75 mm/second; green, 25-75 mm/s; black, slower than 25 mm/s.

(b) Quantification of total distance and speed of G4247A F1 zebrafish at 7 days post-fertilization (Means  $\pm$  SEM, n = 12 for each group). Significance was calculated with unpaired two-tailed Student's t test (ns, not significant).



(c) Left panels, live images of control and G8892A F0 zebrafish at 90 days post-fertilization. Lateral view, anterior to the left. Scale bar, 20 mm. Right panels, representative swim tracking of individual animals.

(d) Quantification of total distance and speed of G8892A F0 zebrafish at 90 days post-fertilization (Means  $\pm$  SEM, n = 6 for each group). Significance was calculated with unpaired two-tailed Student's t test (ns, not significant).

(e) Left panels, live images of control and G8892A F1 zebrafish at 120 days post-fertilization. Scale bar, 2 mm. Right panels, representative swim tracking of individual animals.

(f) Quantification of total distance and speed of G8892A F1 zebrafish at 120 days post-fertilization (Means  $\pm$  SEM, n = 8 for each group). Significance was calculated with unpaired two-tailed Student's t test (ns, not significant).

Figure S8

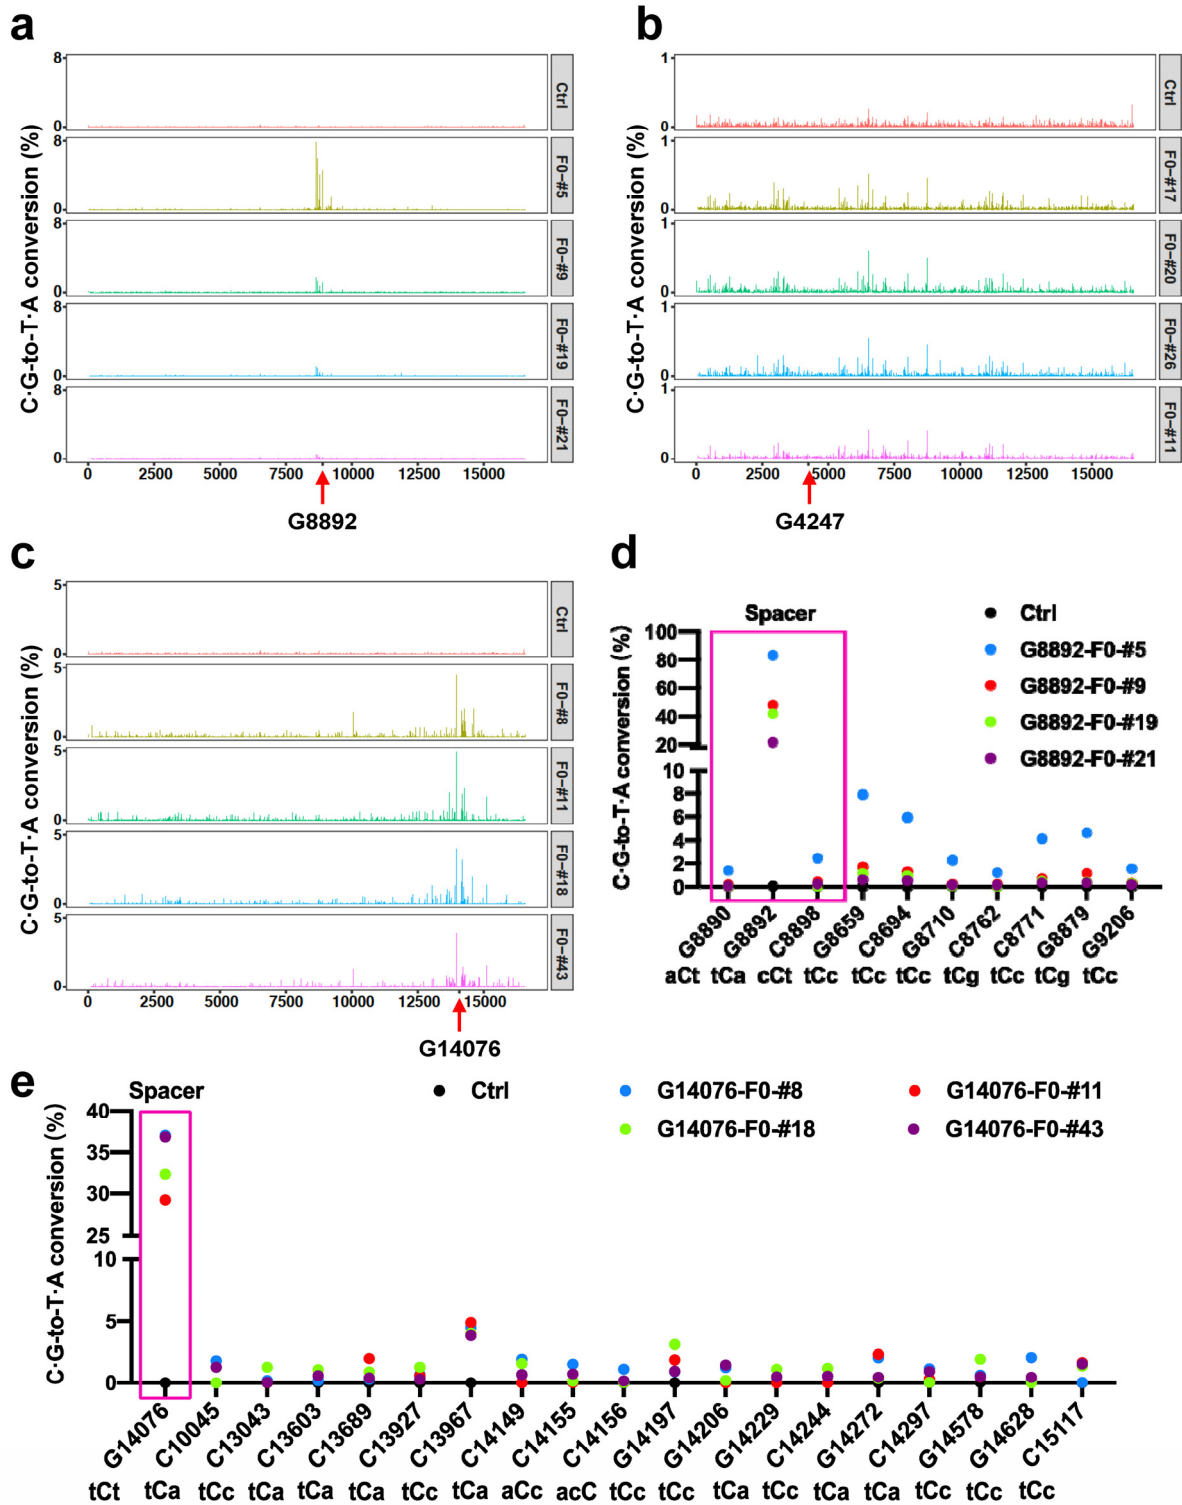

Figure S8. Off-target analysis by whole mtDNA sequencing.

(a-c) Whole mtDNA sequencing analysis of off-target sites in G8892 (a), G4247 (b) and G14076 (c) founders. The maximum C·G-to-T·A conversion rate at each site from 5 wild-type fish was selected as a representative control, which was used in a-c panels.

(d, e) Off-target sites with conversion rate over 1% in any sample were displayed in G8892 (d), and G14076 (e) founders. Spacing region is boxed in red. Motifs of off-target sites are labelled at the bottom.

**Figure S9**

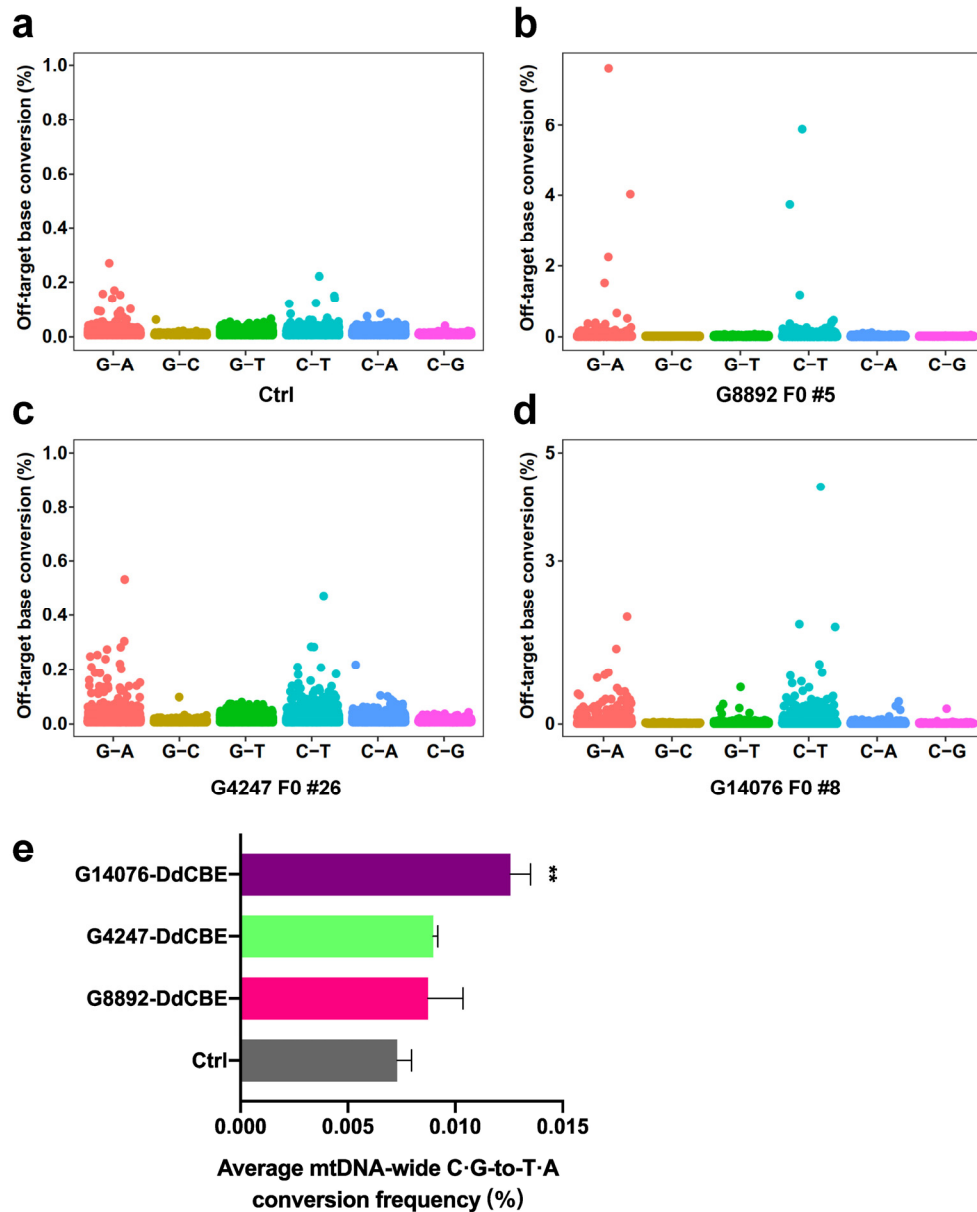

**Figure S9. Off-target analysis in founders.**

(a-d) The frequency of off-target base conversions in control (a), G8892 F0 #5 (b), G4247 F0 #26 (c) and G14076 F0 #8 (d).

(e) Average frequency of mtDNA-wide C-G-to-T-A off-target conversions for each DdCBE pair and control. Values and error bars reflect Means  $\pm$  SEM ( $n = 4$  for each DdCBE treated group,  $n = 5$  for control). Significance was calculated with unpaired two-tailed Student's  $t$  test (\*\*,  $P < 0.01$ ).

**Table S1. Summary of DdCBE toxicity on zebrafish embryos.**

| Substance  | Injection dosage (pg) | Replicates | Total # of injected embryos | 24 hrs SR (%) | SD  | 96 hrs SR (%) | SD  | Nonspecific toxicity (%) |
|------------|-----------------------|------------|-----------------------------|---------------|-----|---------------|-----|--------------------------|
| Phenol red | —                     | 3          | 314                         | 93.7          | 7.6 | 93.8          | 3.6 | —                        |
| G8892      | 50                    | 3          | 309                         | 94.9          | 7.8 | 94            | 7.7 | 5.8                      |
|            | 200                   | 3          | 372                         | 90.1          | 4.9 | 89.3          | 5.6 | 13.4                     |
| G4247      | 50                    | 3          | 345                         | 92            | 8.4 | 90.6          | 6.6 | 6.7                      |
|            | 200                   | 3          | 348                         | 87.5          | 9.6 | 81            | 8.2 | 21                       |

SR, survival rates. SD, standard deviation. Nonspecific toxicity determined by the portion of live embryos exhibit defects or developmental delay in all replicates.

**Table S2. Summary of mtDNA base editing efficiency of founders.**

| Site   | Tested individuals | Edited individuals | Mutation load |
|--------|--------------------|--------------------|---------------|
| G8892  | 80                 | 66                 | 5.78% -88.32% |
| G4247  | 30                 | 8                  | 6.36% -23.48% |
| G14076 | 72                 | 43                 | 9.31% -67.9%  |

**Table S3. Summary of germline transmission in offspring.**

| Site  | Founder fish | F0 mutation load in skin cells | Edited F1/Total | Mutation load  |
|-------|--------------|--------------------------------|-----------------|----------------|
| G8892 | #9           | 46.02%                         | 0/40            | 0              |
|       | #19          | 55.80%                         | 28/40           | 2.82% -20.97%  |
|       | #21          | 16.71%                         | 38/80           | 50.95% -84.33% |
|       | #26          | 46.39%                         | 30/48           | 4.95% -58.54%  |
|       | #31          | 11.90%                         | 16/40           | 1.33% -11.88%  |
|       | #32          | 88.32%                         | 29/40           | 5.59% -30.54%  |
| G4247 | #1           | 9.46%                          | 20/40           | 6.32% -40.42%  |
|       | #11          | 12.20%                         | 4/40            | 10.87% -23.83% |

**Table S4. Primers information.**

|                                  | <b>Primers</b>      | <b>Sequence (5'-3')</b>                                        |
|----------------------------------|---------------------|----------------------------------------------------------------|
| <b>Primers for RVD</b>           | RVD seq For         | TGACCGCAGTGGAGGCAGTG                                           |
|                                  | RVD seq Rev         | TTCACTGCATCCAGCGCAGG                                           |
| <b>Primers for genotyping</b>    | zeb-G3890A-seq-Fwd  | AAGGATCGGAAAAAGGGGGC                                           |
|                                  | zeb-G3890A-seq-Rev  | AGTCCTCGGGGGCCTATTAC                                           |
|                                  | zeb-G4247A-seq-Fwd  | ACCCATACCCATGCCCTATC                                           |
|                                  | zeb-G4247A-seq-Rev  | CCCCCTCTGTAAGATCGAACG                                          |
|                                  | zeb-G8892A-seq-Fwd  | CCCATTGTAGTCGAAGCCGT                                           |
|                                  | zeb-G8892A-seq-Rev  | CCTAAAAGGTAGGGGCTCGC                                           |
|                                  | zeb-G12833A-seq-Fwd | TAGGGGTAAAGCCCCCTCA                                            |
|                                  | zeb-G12833A-seq-Rev | GACCAGGTGATGAATAAGGCGA                                         |
|                                  | zeb-G14076-seq-Fwd  | GGGGAACCTACCACACCCTAC                                          |
|                                  | zeb-G14076-seq-Rev  | TGCGGTAATGATGTGGCGA                                            |
| <b>Barcoded Primers for PCR1</b> | zeb-G4247A-i5-Fwd1  | ACACTCTTCCCTACACGACGCTCTTCCGATCTCAA<br>CCTGGGATCAGGTTGAGCAT    |
|                                  | zeb-G4247A-i5-Fwd2  | ACACTCTTCCCTACACGACGCTCTTCCGATCTTCA<br>CCTGGGATCAGGTTGAGCAT    |
|                                  | zeb-G4247A-i5-Fwd3  | ACACTCTTCCCTACACGACGCTCTTCCGATCTACC<br>CCTGGGATCAGGTTGAGCAT    |
|                                  | zeb-G4247A-i5-Fwd4  | ACACTCTTCCCTACACGACGCTCTTCCGATCTGTA<br>CCTGGGATCAGGTTGAGCAT    |
|                                  | zeb-G4247A-i5-Fwd5  | ACACTCTTCCCTACACGACGCTCTTCCGATCTCAG<br>CCTGGGATCAGGTTGAGCAT    |
|                                  | zeb-G4247A-i7-Rev   | GTGACTGGAGTTCAGACGTGTGCTCTTCCGATCTT<br>GGTCCTGCTGCATACTCTAC    |
|                                  | zeb-G8892A-i5-Fwd1  | ACACTCTTCCCTACACGACGCTCTTCCGATCTCAA<br>TAGAAGACGCCTCACTAAGATGC |
|                                  | zeb-G8892A-i5-Fwd2  | ACACTCTTCCCTACACGACGCTCTTCCGATCTTCA<br>TAGAAGACGCCTCACTAAGATGC |
|                                  | zeb-G8892A-i5-Fwd3  | ACACTCTTCCCTACACGACGCTCTTCCGATCTACC<br>TAGAAGACGCCTCACTAAGATGC |
|                                  | zeb-G8892A-i5-Fwd4  | ACACTCTTCCCTACACGACGCTCTTCCGATCTGTA<br>TAGAAGACGCCTCACTAAGATGC |
|                                  | zeb-G8892A-i5-Fwd5  | ACACTCTTCCCTACACGACGCTCTTCCGATCTCAG<br>TAGAAGACGCCTCACTAAGATGC |
|                                  | zeb-G8892A-i7-Rev   | GTGACTGGAGTTCAGACGTGTGCTCTTCCGATCTG<br>TAGGGGCTCGCGAATTGAT     |
|                                  | zeb-G14076A-i5-Fwd1 | ACACTCTTCCCTACACGACGCTCTTCCGATCTCAA<br>GGGGAACCTACCACACCCTAC   |
|                                  | zeb-G14076A-i5-Fwd2 | ACACTCTTCCCTACACGACGCTCTTCCGATCTTCA<br>GGGGAACCTACCACACCCTAC   |
|                                  | zeb-G14076A-i5-Fwd3 | ACACTCTTCCCTACACGACGCTCTTCCGATCTACC<br>GGGGAACCTACCACACCCTAC   |
|                                  | zeb-G14076A-i5-Fwd4 | ACACTCTTCCCTACACGACGCTCTTCCGATCTGTA<br>GGGGAACCTACCACACCCTAC   |
|                                  | zeb-G14076A-i5-Fwd5 | ACACTCTTCCCTACACGACGCTCTTCCGATCTCAG<br>GGGGAACCTACCACACCCTAC   |
|                                  | zeb-G14076A-i7-Rev  | GTGACTGGAGTTCAGACGTGTGCTCTTCCGATCTT<br>GCGGTAATGATGTGGCGA      |

|                                        |                                                                 |                           |
|----------------------------------------|-----------------------------------------------------------------|---------------------------|
| EGPP-T-i5-Fwd1                         | ACACTCTTTCCCTACACGACGCTCTTCCGATCTCAA<br>GATCACTCTCGGCATGGACG    |                           |
| EGPP-T-i5-Fwd2                         | ACACTCTTTCCCTACACGACGCTCTTCCGATCTTCA<br>GATCACTCTCGGCATGGACG    |                           |
| EGPP-T-i5-Fwd3                         | ACACTCTTTCCCTACACGACGCTCTTCCGATCTACC<br>GATCACTCTCGGCATGGACG    |                           |
| EGPP-T-i5-Fwd4                         | ACACTCTTTCCCTACACGACGCTCTTCCGATCTGTA<br>GATCACTCTCGGCATGGACG    |                           |
| EGPP-T-i5-Fwd5                         | ACACTCTTTCCCTACACGACGCTCTTCCGATCTCAG<br>GATCACTCTCGGCATGGACG    |                           |
| EGPP-T-i7-Rev                          | GTGACTGGAGTTCAGACGTGTGCTCTTCCGATCTA<br>CAAACCACAAC TAGAATGCAGTG |                           |
| <hr/>                                  |                                                                 |                           |
| zeb-mt F1-Fwd                          | GAAAGGGAAGGAACTCGGCAAAC                                         |                           |
| <b>Primers for long-<br/>range PCR</b> | zeb-mt F1-Rev                                                   | AGAAGAGGTGTTGATAGTGGGTCTG |
|                                        | zeb-mt F2-Fwd                                                   | CCTAGCACTCCTAGTAGCCACAG   |
|                                        | zeb-mt F2-Rev                                                   | CTCCAAAGGGTCTTCTCGTCTTGTA |
| <hr/>                                  |                                                                 |                           |



## Supplementary sequence

DdCBE domains are annotated as: red for MTS, italics for linker, yellow for flag tag, green for N&C-terminal domain, underlined for RVD, purple for half of DddA<sub>tox</sub>, cyan for UGI. All amino acid sequences of DdCBE vectors targeting G4247A are displayed. Only RVDs sequences are showed for G3890A, G8892A, G12833A and G14076A.

### Zebrafish G4247A Left TALE-G1333C-UGI

MLGFVGRVAAAAPASGALRRRLTPSASLPPAQLLLRAAPTAVHPVRDYAAQTSES~~GGGGSPG~~AAAD  
YKDDDDKGSV~~DLRTL~~GY~~SQQQ~~EKIKPKV~~RSTVAQHHEALVGHGFTHAHIVAL~~SQH~~PAALGTVA~~  
VKYQDMIAALPEATHEAIVGVGKQWSGARALEALLTVAGELRGPPLQLDTGQLLKI~~AKRGGVTA~~  
VEAVHAWRNALTGAPLNLTPEQVVAIASNNGGKQALETVQRLLPVLCQAHGLTPEQVVAIASN  
GGKQALETVQRLLPVLCQAHGLTPEQVVAIASNIGGKQALETVQRLLPVLCQAHGLTPDQVVAI  
ASNNGGKQALETVQRLLPVLCQAHGLTPEQVVAIASH~~DGGKQALETVQRLLPVLCQAHGLTPAQ~~  
VVAIASNNGGKQALETVQRLLPVLCQAHGLTPEQVVAIASH~~DGGKQALETVQRLLPVLCQAHGL~~  
TPAQVVAIASNIGGKQALETVQRLLPVLCQAHGLTPDQVVAIASNIGGKQALETVQRLLPVLCQ  
AHGLTPDQVVAIASNIGGKQALETVQRLLPVLCQAHGLTPDQVVAIASH~~DGGKQALETVQRLLP~~  
VLCQAHGLTPAQVVAIASNIGGKQALETVQRLLPVLCQAHGLTPDQVVAIASNIGGKQALETVQ  
RLLPVLCQAHGLTPDQVVAIASN~~GGGKQALETVQRLLPVLCQAHGLTPEQVVAIASN~~GGGKQAL  
ETVQRLLPVLCQAHGLTPEQVVAIASN~~GGGRPALESIVAQLSRPDPALAAL~~TNDHLVALACLG  
G  
RPALDAVKKGLGGSPTPYPNYANAGHVEGQSALFMRDNGISEGLVFHNNPEGTCTGFCVNMTE  
TL  
LPENAKMTVVPPEGAIPV~~KRGATGETKVFTGNSNSPKSPTKGGC~~SGGSTNLSDIIEKETGKQLV  
IQESILMLPEEVEEVIGNKPESDILVHTAYDESTDENVMLLTSDAPEYKPWALVIQDSNGENKI  
KML

### Zebrafish G4247A Left TALE-G1397C-UGI

MLGFVGRVAAAAPASGALRRRLTPSASLPPAQLLLRAAPTAVHPVRDYAAQTSES~~GGGGSPG~~AAAD  
YKDDDDKGSV~~DLRTL~~GY~~SQQQ~~EKIKPKV~~RSTVAQHHEALVGHGFTHAHIVAL~~SQH~~PAALGTVA~~  
VKYQDMIAALPEATHEAIVGVGKQWSGARALEALLTVAGELRGPPLQLDTGQLLKI~~AKRGGVTA~~  
VEAVHAWRNALTGAPLNLTPEQVVAIASNNGGKQALETVQRLLPVLCQAHGLTPEQVVAIASN  
GGKQALETVQRLLPVLCQAHGLTPEQVVAIASNIGGKQALETVQRLLPVLCQAHGLTPDQVVAI  
ASNNGGKQALETVQRLLPVLCQAHGLTPEQVVAIASH~~DGGKQALETVQRLLPVLCQAHGLTPAQ~~  
VVAIASNNGGKQALETVQRLLPVLCQAHGLTPEQVVAIASH~~DGGKQALETVQRLLPVLCQAHGL~~  
TPAQVVAIASNIGGKQALETVQRLLPVLCQAHGLTPDQVVAIASNIGGKQALETVQRLLPVLCQ  
AHGLTPDQVVAIASNIGGKQALETVQRLLPVLCQAHGLTPDQVVAIASH~~DGGKQALETVQRLLP~~  
VLCQAHGLTPAQVVAIASNIGGKQALETVQRLLPVLCQAHGLTPDQVVAIASNIGGKQALETVQ  
RLLPVLCQAHGLTPDQVVAIASN~~GGGKQALETVQRLLPVLCQAHGLTPEQVVAIASN~~GGGKQAL  
ETVQRLLPVLCQAHGLTPEQVVAIASN~~GGGRPALESIVAQLSRPDPALAAL~~TNDHLVALACLG  
G  
RPALDAVKKGLGGS~~AI~~PV~~KRGATGETKVFTGNSNSPKSPTKGGC~~SGGSTNLSDIIEKETGKQLV

IQESILMLPEEVEEVIGNKPESDILVHTAYDESTDENVMLLTSDAPEYKPWALVIQDSNGENKIKML

### Zebrafish G4247A Left TALE-G1333N-UGI

MLGFVGRVAAA PASGALRRLTPSASLPPAQLLLRAAPTAVHPVRDYAAQTSES GGGSPG AAAD  
YKDDDDKGS VDLRTLGY SQQQEKIKPKV RSTVAQHHEALVGHGFTHAHIVAL SQHPAALGTVA  
VKYQDMIAALPEATHEAIVGVGKQWSGARALEALLTVAGELRGPPLQLDTGQLLKIARGGVTA  
VEAVHAWRNALTGAPLNLTPEQVVAIASNNGGKQALETVQRLLPVLCQAHGLTPEQVVAIASNG  
GGKQALETVQRLLPVLCQAHGLTPEQVVAIASNIGGKQALETVQRLLPVLCQAHGLTPDQVVAI  
ASNNGGKQALETVQRLLPVLCQAHGLTPEQVVAIASHDGGKQALETVQRLLPVLCQAHGLTPAQ  
VVAIASNNGGKQALETVQRLLPVLCQAHGLTPEQVVAIASHDGGKQALETVQRLLPVLCQAHGL  
TPAQVVAIASNIGGKQALETVQRLLPVLCQAHGLTPDQVVAIASNIGGKQALETVQRLLPVLCQ  
AHGLTPDQVVAIASNIGGKQALETVQRLLPVLCQAHGLTPDQVVAIASHDGGKQALETVQRLLP  
VLCQAHGLTPAQVVAIASNIGGKQALETVQRLLPVLCQAHGLTPDQVVAIASNIGGKQALETVQ  
RLLPVLCQAHGLTPDQVVAIASNNGGKQALETVQRLLPVLCQAHGLTPEQVVAIASNNGGKQAL  
ETVQRLLPVLCQAHGLTPEQVVAIASNNGGRPALSIVAQLSRPDPALAAALNDHLVALACLGG  
RPALDAVKKGLGSGSYALGPYQISAPQLPAYNGQTVGTFYVNDAGGLESKVFSSGGSGGSTN  
LSDIIEKETGKQLVIQESILMLPEEVEEVIGNKPESDILVHTAYDESTDENVMLLTSDAPEYKP  
WALVIQDSNGENKIKML

### Zebrafish G4247A Left TALE-G1397N-UGI

MLGFVGRVAAA PASGALRRLTPSASLPPAQLLLRAAPTAVHPVRDYAAQTSES GGGSPG AAAD  
YKDDDDKGS VDLRTLGY SQQQEKIKPKV RSTVAQHHEALVGHGFTHAHIVAL SQHPAALGTVA  
VKYQDMIAALPEATHEAIVGVGKQWSGARALEALLTVAGELRGPPLQLDTGQLLKIARGGVTA  
VEAVHAWRNALTGAPLNLTPEQVVAIASNNGGKQALETVQRLLPVLCQAHGLTPEQVVAIASNG  
GGKQALETVQRLLPVLCQAHGLTPEQVVAIASNIGGKQALETVQRLLPVLCQAHGLTPDQVVAI  
ASNNGGKQALETVQRLLPVLCQAHGLTPEQVVAIASHDGGKQALETVQRLLPVLCQAHGLTPAQ  
VVAIASNNGGKQALETVQRLLPVLCQAHGLTPEQVVAIASHDGGKQALETVQRLLPVLCQAHGL  
TPAQVVAIASNIGGKQALETVQRLLPVLCQAHGLTPDQVVAIASNIGGKQALETVQRLLPVLCQ  
AHGLTPDQVVAIASNIGGKQALETVQRLLPVLCQAHGLTPDQVVAIASHDGGKQALETVQRLLP  
VLCQAHGLTPAQVVAIASNIGGKQALETVQRLLPVLCQAHGLTPDQVVAIASNIGGKQALETVQ  
RLLPVLCQAHGLTPDQVVAIASNNGGKQALETVQRLLPVLCQAHGLTPEQVVAIASNNGGKQAL  
ETVQRLLPVLCQAHGLTPEQVVAIASNNGGRPALSIVAQLSRPDPALAAALNDHLVALACLGG  
RPALDAVKKGLGSGSYALGPYQISAPQLPAYNGQTVGTFYVNDAGGLESKVFSSGGPTYPN  
YANAGHVEGQSALFMRDNGISEGLVFHNNPEGTCGFCVNMTE TLLPENAKMTVVPPEGSGGSTN  
LSDIIEKETGKQLVIQESILMLPEEVEEVIGNKPESDILVHTAYDESTDENVMLLTSDAPEYKP  
WALVIQDSNGENKIKML

### Zebrafish G4247A Right TALE-G1333C-UGI

MLGFVGRVAAA PASGALRRLTPSASLPPAQLLLRAAPTAVHPVRDYAAQTSES GGGSPG AAAD  
YKDDDDKGS VDLRTLGY SQQQEKIKPKV RSTVAQHHEALVGHGFTHAHIVAL SQHPAALGTVA  
VKYQDMIAALPEATHEAIVGVGKQWSGARALEALLTVAGELRGPPLQLDTGQLLKIARGGVTA

VEAVHARNALTGAPLNLTPEQVVAIASNIGGKQALETVQRLLPVLCQAHGLTPDQVVAIASNI  
GGKQALETVQRLLPVLCQAHGLTPDQVVAIASNNGGKQALETVQRLLPVLCQAHGLTPEQVVAI  
ASNIGGKQALETVQRLLPVLCQAHGLTPDQVVAIASNNGGKQALETVQRLLPVLCQAHGLTPEQ  
VVAIASNIGGKQALETVQRLLPVLCQAHGLTPDQVVAIASNIGGKQALETVQRLLPVLCQAHGL  
TPDQVVAIASNNGGKQALETVQRLLPVLCQAHGLTPEQVVAIASNIGGKQALETVQRLLPVLCQ  
AHGLTPDQVVAIASNIGGKQALETVQRLLPVLCQAHGLTPDQVVAIASNNGGKQALETVQRLLP  
VLCQAHGLTPEQVVAIASNNGGKQALETVQRLLPVLCQAHGLTPEQVVAIASHDGGKQALETVQ  
RLLPVLCQAHGLTPAQVVAIASHDGGKQALETVQRLLPVLCQAHGLTPAQVVAIASNNGGGRPAL  
E SIVAQLSRPDPALAAALTNDHLVALACLGGRPALDAVKKGLG GSPTYPNYANAGHVEGQSALF  
MRDNGISEGLVFHNNPEGTCGFCVNMTEPLL PENAKMTVVPPEGAI PVKRGATGETKVFTGNSN  
SPKSPTKGGC SGGSTNLSDI IEKETGKQLVIQESILMLPEEVVEEVIGNKPESDILVHTAYDEST  
DENVMLLTSDAPEYKPWALVIQDSNGENKIKML

### Zebrafish G4247A Right TALE-G1397C-UGI

MLGFVGRVAAA PASGALRRLTPSASLPPAQLLLRAAPTAVHPVRDYAAQTSES GGGGSPG AAAD  
YKDDDDKGS VDLRTLGY SQQQEKIKPKVRS TVAQHHEALVGHGFTHAHIVAL SQHPAALGTVA  
VKYQDMIAALPEATHEAIVGVGKQWSGARALEALLTVAGELRGPPLQLDTGQLLKI AKRGGVTA  
VEAVHARNALTGAPLNLTPEQVVAIASNIGGKQALETVQRLLPVLCQAHGLTPDQVVAIASNI  
GGKQALETVQRLLPVLCQAHGLTPDQVVAIASNNGGKQALETVQRLLPVLCQAHGLTPEQVVAI  
ASNIGGKQALETVQRLLPVLCQAHGLTPDQVVAIASNNGGKQALETVQRLLPVLCQAHGLTPEQ  
VVAIASNIGGKQALETVQRLLPVLCQAHGLTPDQVVAIASNIGGKQALETVQRLLPVLCQAHGL  
TPDQVVAIASNNGGKQALETVQRLLPVLCQAHGLTPEQVVAIASNIGGKQALETVQRLLPVLCQ  
AHGLTPDQVVAIASNIGGKQALETVQRLLPVLCQAHGLTPDQVVAIASNNGGKQALETVQRLLP  
VLCQAHGLTPEQVVAIASNNGGKQALETVQRLLPVLCQAHGLTPEQVVAIASHDGGKQALETVQ  
RLLPVLCQAHGLTPAQVVAIASHDGGKQALETVQRLLPVLCQAHGLTPAQVVAIASNNGGGRPAL  
E SIVAQLSRPDPALAAALTNDHLVALACLGGRPALDAVKKGLG GSAPVKRGATGETKVFTGNSN  
SPKSPTKGGC SGGSTNLSDI IEKETGKQLVIQESILMLPEEVVEEVIGNKPESDILVHTAYDEST  
DENVMLLTSDAPEYKPWALVIQDSNGENKIKML

### Zebrafish G4247A Right TALE-G1333N-UGI

MLGFVGRVAAA PASGALRRLTPSASLPPAQLLLRAAPTAVHPVRDYAAQTSES GGGGSPG AAAD  
YKDDDDKGS VDLRTLGY SQQQEKIKPKVRS TVAQHHEALVGHGFTHAHIVAL SQHPAALGTVA  
VKYQDMIAALPEATHEAIVGVGKQWSGARALEALLTVAGELRGPPLQLDTGQLLKI AKRGGVTA  
VEAVHARNALTGAPLNLTPEQVVAIASNIGGKQALETVQRLLPVLCQAHGLTPDQVVAIASNI  
GGKQALETVQRLLPVLCQAHGLTPDQVVAIASNNGGKQALETVQRLLPVLCQAHGLTPEQVVAI  
ASNIGGKQALETVQRLLPVLCQAHGLTPDQVVAIASNNGGKQALETVQRLLPVLCQAHGLTPEQ  
VVAIASNIGGKQALETVQRLLPVLCQAHGLTPDQVVAIASNIGGKQALETVQRLLPVLCQAHGL  
TPDQVVAIASNNGGKQALETVQRLLPVLCQAHGLTPEQVVAIASNIGGKQALETVQRLLPVLCQ  
AHGLTPDQVVAIASNIGGKQALETVQRLLPVLCQAHGLTPDQVVAIASNNGGKQALETVQRLLP  
VLCQAHGLTPEQVVAIASNNGGKQALETVQRLLPVLCQAHGLTPEQVVAIASHDGGKQALETVQ  
RLLPVLCQAHGLTPAQVVAIASHDGGKQALETVQRLLPVLCQAHGLTPAQVVAIASNNGGGRPAL  
E SIVAQLSRPDPALAAALTNDHLVALACLGGRPALDAVKKGLG GSGSYALGPYQISAPQLPAYNG

QTVGTFYYVNDAGGLESKVFSSGGSGGSTNLSDIIEKETGKQLVIQESILMLPEEVEEVIGNKP  
ESDILVHTAYDESTDENVMLLTSDAPEYKPWALVIQDSNGENKIKML

### Zebrafish G4247A Right TALE-G1397N-UGI

MLGFVGRVAAAAPASGALRRLTPSASLPPAQLLLRAAPTAVHPVRDYAAQTSSESGGGSPGAAAD  
YKDDDDKGSVDLRTLGYSSQQQEKIKPKVRSTVAQHHEALVGHGFTHAHIVALSQHPAALGTVA  
VKYQDMIAALPEATHEAIVGVGKQWSGARALEALLTVAGELRGPPLQLDTGQLLKIAKRGGVTA  
VEAVHAWRNALTGAPLNLTPEQVVAIASNIGGKQALETVQRLLPVLCQAHGLTPDQVVAIASNI  
GGKQALETVQRLLPVLCQAHGLTPDQVVAIASNNGGKQALETVQRLLPVLCQAHGLTPEQVVAI  
ASNIGGKQALETVQRLLPVLCQAHGLTPDQVVAIASNNGGKQALETVQRLLPVLCQAHGLTPEQ  
VVAIASNIGGKQALETVQRLLPVLCQAHGLTPDQVVAIASNIGGKQALETVQRLLPVLCQAHGL  
TPDQVVAIASNNGGKQALETVQRLLPVLCQAHGLTPEQVVAIASNIGGKQALETVQRLLPVLCQ  
AHGLTPDQVVAIASNIGGKQALETVQRLLPVLCQAHGLTPDQVVAIASNNGGKQALETVQRLLP  
VLCQAHGLTPEQVVAIASNNGGKQALETVQRLLPVLCQAHGLTPEQVVAIASHDGGKQALETVQ  
RLLPVLCQAHGLTPAQVVAIASHDGGKQALETVQRLLPVLCQAHGLTPAQVVAIASNNGGRP  
ALESTIVAQLSRPDPALAALTNDHLVALACLGGRPALDAVKKGLGSGSGSYALGPYQISAPQLPAYNG  
QTVGTFYYVNDAGGLESKVFSSGGPTYPYNYANAGHVEGQSALFMRDNGISEGLVFHNNPEGTC  
GFCVNMTEPLLPENAKMTVVPPEGSGGSTNLSDIIEKETGKQLVIQESILMLPEEVEEVIGNKP  
ESDILVHTAYDESTDENVMLLTSDAPEYKPWALVIQDSNGENKIKML

### Zebrafish G3890A Left TALE

LTPEQVVAIASNNGGKQALETVQRLLPVLCQAHGLTPEQVVAIASHDGGKQALETVQRLLPVLC  
QAHGLTPAQVVAIASNIGGKQALETVQRLLPVLCQAHGLTPDQVVAIASNNGGKQALETVQRL  
PVLCQAHGLTPEQVVAIASNNGGKQALETVQRLLPVLCQAHGLTPEQVVAIASNIGGKQALETV  
QRLLPVLCQAHGLTPDQVVAIASNNGGKQALETVQRLLPVLCQAHGLTPEQVVAIASHDGGKQ  
ALETVQRLLPVLCQAHGLTPAQVVAIASHDGGKQALETVQRLLPVLCQAHGLTPAQVVAIASN  
GGKQALETVQRLLPVLCQAHGLTPEQVVAIASNNGGKQALETVQRLLPVLCQAHGLTPEQVVAI  
ASHDGGKQALETVQRLLPVLCQAHGLTPAQVVAIASHDGGKQALETVQRLLPVLCQAHGLTPAQ  
VVAIASNNGGKQALETVQRLLPVLCQAHGLTPEQVVAIASNNGGRP

### Zebrafish G3890A Right TALE

LTPEQVVAIASNIGGKQALETVQRLLPVLCQAHGLTPDQVVAIASNNGGKQALETVQRLLPVLC  
QAHGLTPEQVVAIASNIGGKQALETVQRLLPVLCQAHGLTPDQVVAIASNNGGKQALETVQRL  
PVLCQAHGLTPEQVVAIASNIGGKQALETVQRLLPVLCQAHGLTPDQVVAIASNNGGKQALETV  
QRLLPVLCQAHGLTPEQVVAIASHDGGKQALETVQRLLPVLCQAHGLTPAQVVAIASHDGGKQ  
ALETVQRLLPVLCQAHGLTPAQVVAIASNNGGKQALETVQRLLPVLCQAHGLTPEQVVAIASN  
IGGKQALETVQRLLPVLCQAHGLTPDQVVAIASNIGGKQALETVQRLLPVLCQAHGLTPDQVVAI

SHDGGKQALETVQRLLPVLCQAHGLTPAQVVAIASNIGGKQALETVQRLLPVLCQAHGLTPDQV  
VAIASHDGGKQALETVQRLLPVLCQAHGLTPAQVVAIASNNGGKQALETVQRLLPVLCQAHGLT  
PEQVVAIASNNGGRPALE

### Zebrafish G8892A Left TALE

LTPEQVVAIASNNGGKQALETVQRLLPVLCQAHGLTPEQVVAIASHDGGKQALETVQRLLPVLC  
QAHGLTPAQVVAIASNNGGKQALETVQRLLPVLCQAHGLTPEQVVAIASNNGGKQALETVQRL  
PVLCQAHGLTPEQVVAIASNIGGKQALETVQRLLPVLCQAHGLTPDQVVAIASHDGGKQALETV  
QRLLPVLCQAHGLTPAQVVAIASHDGGKQALETVQRLLPVLCQAHGLTPAQVVAIASNNGGKQA  
LETVQRLLPVLCQAHGLTPEQVVAIASNIGGKQALETVQRLLPVLCQAHGLTPDQVVAIASHDG  
GKQALETVQRLLPVLCQAHGLTPAQVVAIASHDGGKQALETVQRLLPVLCQAHGLTPAQVVAIA  
SNIGGKQALETVQRLLPVLCQAHGLTPDQVVAIASHDGGKQALETVQRLLPVLCQAHGLTPAQV  
VAIASHDGGKQALETVQRLLPVLCQAHGLTPAQVVAIASHDGGKQALETVQRLLPVLCQAHGLT  
PAQVVAIASNNGGRPALE

### Zebrafish G8892A Right TALE

LTPEQVVAIASHDGGKQALETVQRLLPVLCQAHGLTPAQVVAIASNIGGKQALETVQRLLPVLC  
QAHGLTPDQVVAIASNNGGKQALETVQRLLPVLCQAHGLTPEQVVAIASNNGGKQALETVQRL  
PVLCQAHGLTPEQVVAIASNNGGKQALETVQRLLPVLCQAHGLTPEQVVAIASNNGGKQALETV  
QRLLPVLCQAHGLTPEQVVAIASNNGGKQALETVQRLLPVLCQAHGLTPEQVVAIASNNGGKQA  
LETVQRLLPVLCQAHGLTPEQVVAIASNNGGKQALETVQRLLPVLCQAHGLTPEQVVAIASNNG  
GKQALETVQRLLPVLCQAHGLTPEQVVAIASNNGGKQALETVQRLLPVLCQAHGLTPEQVVAIA  
SNIGGKQALETVQRLLPVLCQAHGLTPDQVVAIASNNGGKQALETVQRLLPVLCQAHGLTPEQV  
VAIASNNGGKQALETVQRLLPVLCQAHGLTPEQVVAIASNIGGKQALETVQRLLPVLCQAHGLT  
PDQVVAIASNIGGKQALETVQRLLPVLCQAHGLTPDQVVAIASNNGGKQALETVQRLLPVLCQA  
HGLTPEQVVAIASHDGGKQALETVQRLLPVLCQAHGLTPAQVVAIASNNGGRPALE

### Zebrafish G12833A Left TALE

LTPEQVVAIASNNGGKQALETVQRLLPVLCQAHGLTPEQVVAIASNNGGKQALETVQRLLPVLC  
QAHGLTPEQVVAIASHDGGKQALETVQRLLPVLCQAHGLTPAQVVAIASNNGGKQALETVQRL  
PVLCQAHGLTPEQVVAIASNNGGKQALETVQRLLPVLCQAHGLTPEQVVAIASHDGGKQALETV  
QRLLPVLCQAHGLTPAQVVAIASHDGGKQALETVQRLLPVLCQAHGLTPAQVVAIASNNGGKQA  
LETVQRLLPVLCQAHGLTPEQVVAIASNNGGKQALETVQRLLPVLCQAHGLTPEQVVAIASNIG  
GKQALETVQRLLPVLCQAHGLTPDQVVAIASHDGGKQALETVQRLLPVLCQAHGLTPAQVVAIA  
SHDGGKQALETVQRLLPVLCQAHGLTPAQVVAIASNNGGKQALETVQRLLPVLCQAHGLTPEQV  
VAIASHDGGKQALETVQRLLPVLCQAHGLTPAQVVAIASNNGGKQALETVQRLLPVLCQAHGLT  
PEQVVAIASNNGGKQALETVQRLLPVLCQAHGLTPEQVVAIASHDGGKQALETVQRLLPVLCQA  
HGLTPAQVVAIASNNGGRPALE

## Zebrafish G12833A Right TALE

LTPEQVVAIASHDGGKQALETVQRLLPVLCQAHGLTPAQVVAIASHDGGKQALETVQRLLPVLC  
QAHGLTPAQVVAIASNNGGKQALETVQRLLPVLCQAHGLTPEQVVAIASNIGGKQALETVQRLL  
PVLCQAHGLTPDQVVAIASNIGGKQALETVQRLLPVLCQAHGLTPDQVVAIASNNGGKQALETV  
QRLLPVLCQAHGLTPEQVVAIASNIGGKQALETVQRLLPVLCQAHGLTPDQVVAIASHDGGKQA  
LETVQRLLPVLCQAHGLTPAQVVAIASHDGGKQALETVQRLLPVLCQAHGLTPAQVVAIASNIG  
GKQALETVQRLLPVLCQAHGLTPDQVVAIASNIGGKQALETVQRLLPVLCQAHGLTPDQVVAIA  
SNNGGKQALETVQRLLPVLCQAHGLTPEQVVAIASNNGGKQALETVQRLLPVLCQAHGLTPEQV  
VAIASNNGGKQALETVQRLLPVLCQAHGLTPEQVVAIASNIGGKQALETVQRLLPVLCQAHGLT  
PDQVVAIASNNGGRPALE

## Zebrafish G14076A Left TALE

LTPEQVVAIASHDGGKQALETVQRLLPVLCQAHGLTPAQVVAIASHDGGKQALETVQRLLPVLC  
QAHGLTPAQVVAIASNNGGKQALETVQRLLPVLCQAHGLTPEQVVAIASNNGGKQALETVQRLL  
PVLCQAHGLTPEQVVAIASNNGGKQALETVQRLLPVLCQAHGLTPEQVVAIASHDGGKQALETV  
QRLLPVLCQAHGLTPAQVVAIASNIGGKQALETVQRLLPVLCQAHGLTPDQVVAIASNNGGKQA  
LETVQRLLPVLCQAHGLTPEQVVAIASNNGGKQALETVQRLLPVLCQAHGLTPEQVVAIASNIG  
GKQALETVQRLLPVLCQAHGLTPDQVVAIASNNGGKQALETVQRLLPVLCQAHGLTPEQVVAIA  
SNNGGKQALETVQRLLPVLCQAHGLTPEQVVAIASNNGGKQALETVQRLLPVLCQAHGLTPEQV  
VAIASNNGGKQALETVQRLLPVLCQAHGLTPEQVVAIASNNGGKQALETVQRLLPVLCQAHGLT  
PEQVVAIASHDGGKQALETVQRLLPVLCQAHGLTPAQVVAIASNNGGRPALE

## Zebrafish G14076A Right TALE

LTPEQVVAIASNNGGKQALETVQRLLPVLCQAHGLTPEQVVAIASNNGGKQALETVQRLLPVLC  
QAHGLTPEQVVAIASNNGGKQALETVQRLLPVLCQAHGLTPEQVVAIASNNGGKQALETVQRLL  
PVLCQAHGLTPEQVVAIASNIGGKQALETVQRLLPVLCQAHGLTPDQVVAIASNNGGKQALETV  
QRLLPVLCQAHGLTPEQVVAIASNNGGKQALETVQRLLPVLCQAHGLTPEQVVAIASNNGGKQA  
LETVQRLLPVLCQAHGLTPEQVVAIASHDGGKQALETVQRLLPVLCQAHGLTPAQVVAIASNNG  
GKQALETVQRLLPVLCQAHGLTPEQVVAIASNNGGKQALETVQRLLPVLCQAHGLTPEQVVAIA  
SHDGGKQALETVQRLLPVLCQAHGLTPAQVVAIASNNGGKQALETVQRLLPVLCQAHGLTPEQV  
VAIASNIGGKQALETVQRLLPVLCQAHGLTPDQVVAIASNNGGRPALE
